# Supplementary material for: An FDA Pooled Analysis of Patients with Melanoma Treated with an Anti-PD1 Antibody Beyond RECIST Progression
Source: PubMed Central journal article supplement — Lancet Oncol. Author manuscript; Available in PMC 2019 Feb 1. (PMC5806609; doi:10.1016/s1470-2045(17)30846-x), 2018-01-18
Supplement: NIHMS937686-supplement-2.pdf [file NIHMS937686-supplement-2.pdf]

## **Supplementary Appendix Table of Contents**

|                                                                                                                                                                                    |    |
|------------------------------------------------------------------------------------------------------------------------------------------------------------------------------------|----|
| Figures .....                                                                                                                                                                      | 2  |
| Appendix Figure S1: Time to Progression in Patients Treated with anti-PD1 Antibody .....                                                                                           | 2  |
| Appendix Figure S2: Duration of Treatment Beyond Progression .....                                                                                                                 | 3  |
| Appendix Figure S3: Waterfall Plot at time of Progressive Disease .....                                                                                                            | 4  |
| Appendix Figure S4: Patients Experiencing Target Tumor Response After Treatment Beyond Progression .....                                                                           | 8  |
| Appendix Figure S5: Percent Change in Tumor Burden from baseline by visit for Patients Progressing due to Target Lesion Increase and Continuing Treatment Beyond Progression ..... | 12 |
| Tables .....                                                                                                                                                                       | 15 |
| Appendix Table S1: Classification of Site of New Lesion Progressive Disease by Mutually Exclusive Categories .....                                                                 | 15 |
| Appendix Table S2: Location of New Lesion at Time of Progression* .....                                                                                                            | 16 |
| Appendix Table S3: Patients Experiencing Target Tumor Response After Treatment Beyond Progression .....                                                                            | 17 |
| Appendix Table S4: Demographics and Disease Characteristics of Patients Treated with Anti PD-1 Antibody with Response from Baseline (n=57) .....                                   | 23 |
| Appendix Table S5: Demographics and Disease Characteristics of TBP and NoTBP Patients on Both Arms of Trial CA209066 .....                                                         | 25 |
| Appendix Table S6: Safety Analysis: Adverse Reactions Experienced in >2% of Patients Treated Beyond Progression By Time Period .....                                               | 27 |
| Appendix Table S7: ECOG Performance Status Evolution with Treatment Beyond Progression .....                                                                                       | 29 |
| Appendix Table S8: Immune-Related Adverse Events within 90 days .....                                                                                                              | 30 |
| Appendix Table S9: Safety Analysis: Adverse Reactions Experienced prior to initial RECIST v1.1 progression with a $\geq 2\%$ difference between cohorts .....                      | 31 |

## Figures

Appendix Figure S1: Time to Progression in Patients Treated with anti-PD1 Antibody

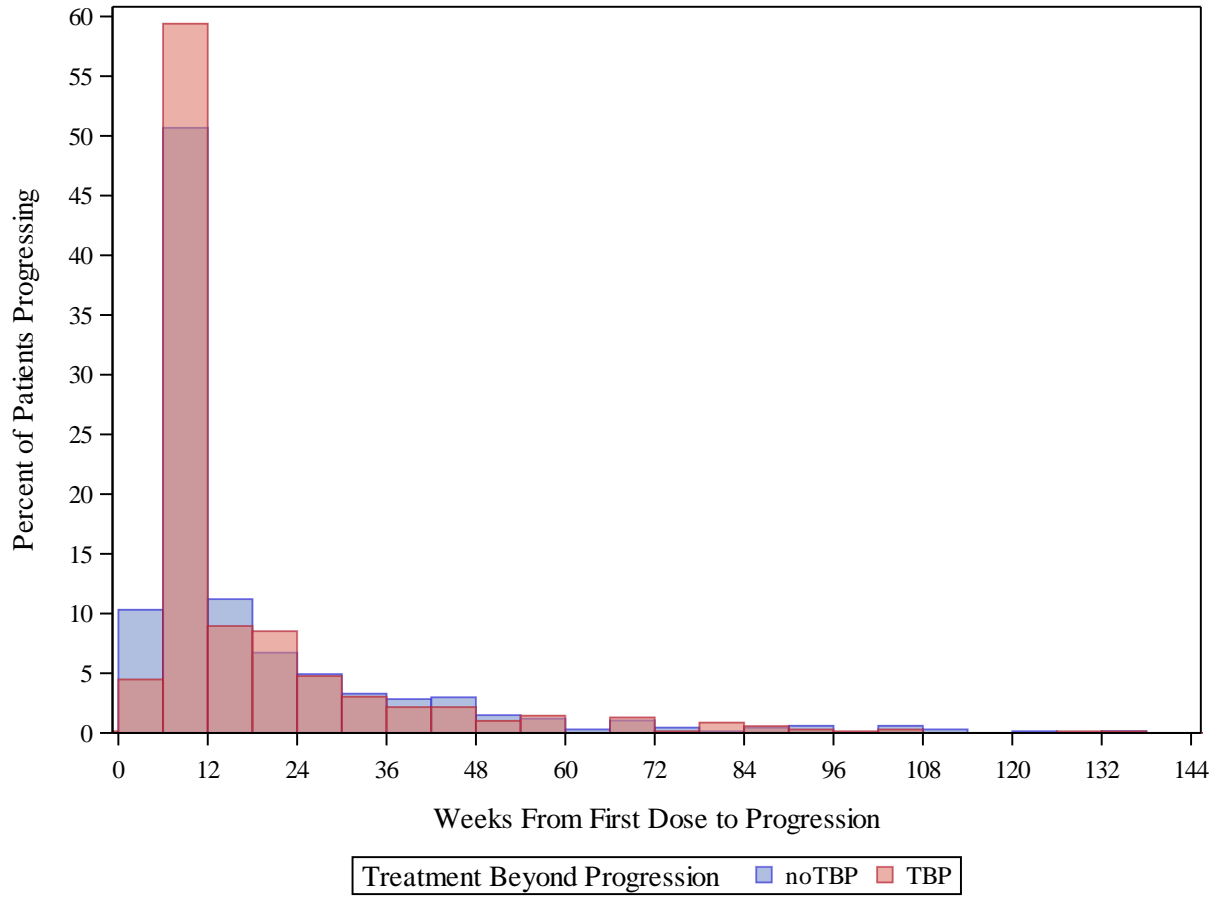

**Appendix Figure S2: Duration of Treatment Beyond Progression**

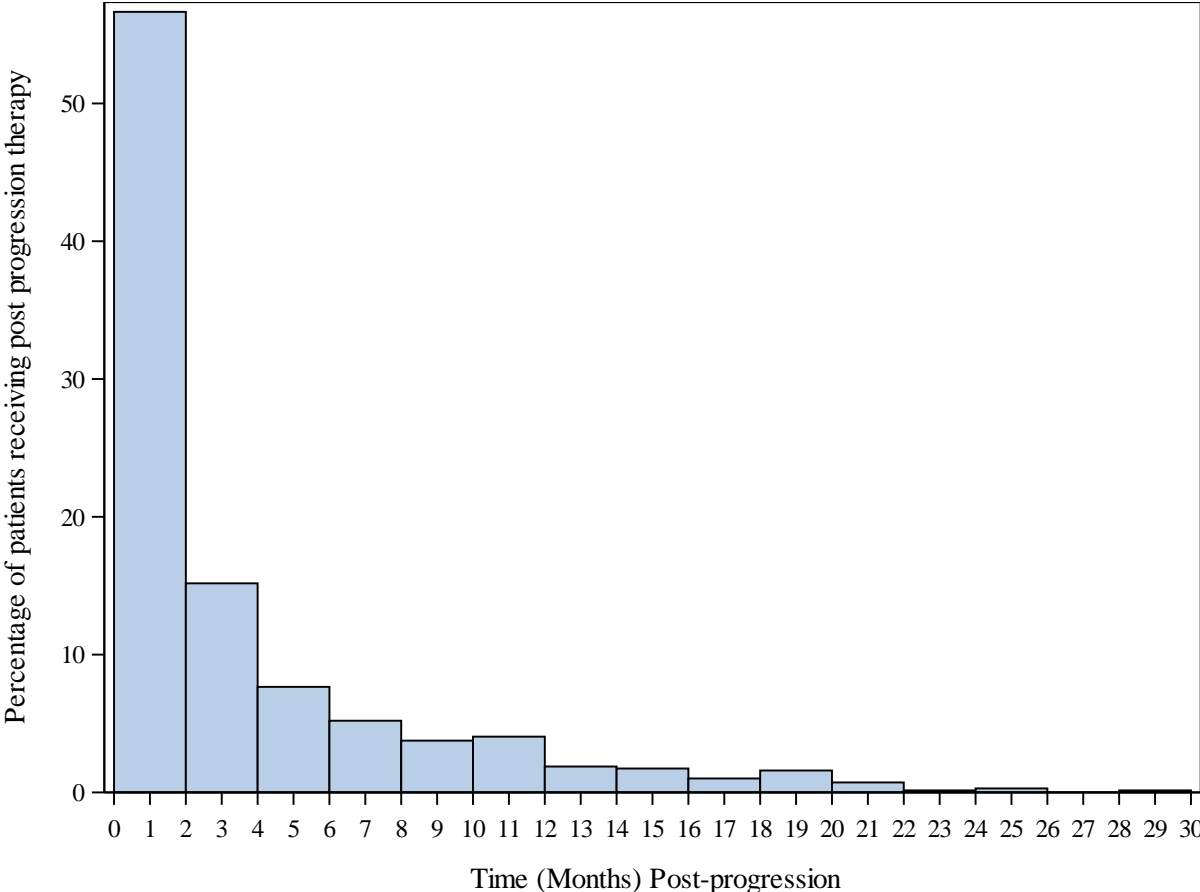

Appendix Figure S3: Waterfall Plot at time of Progressive Disease

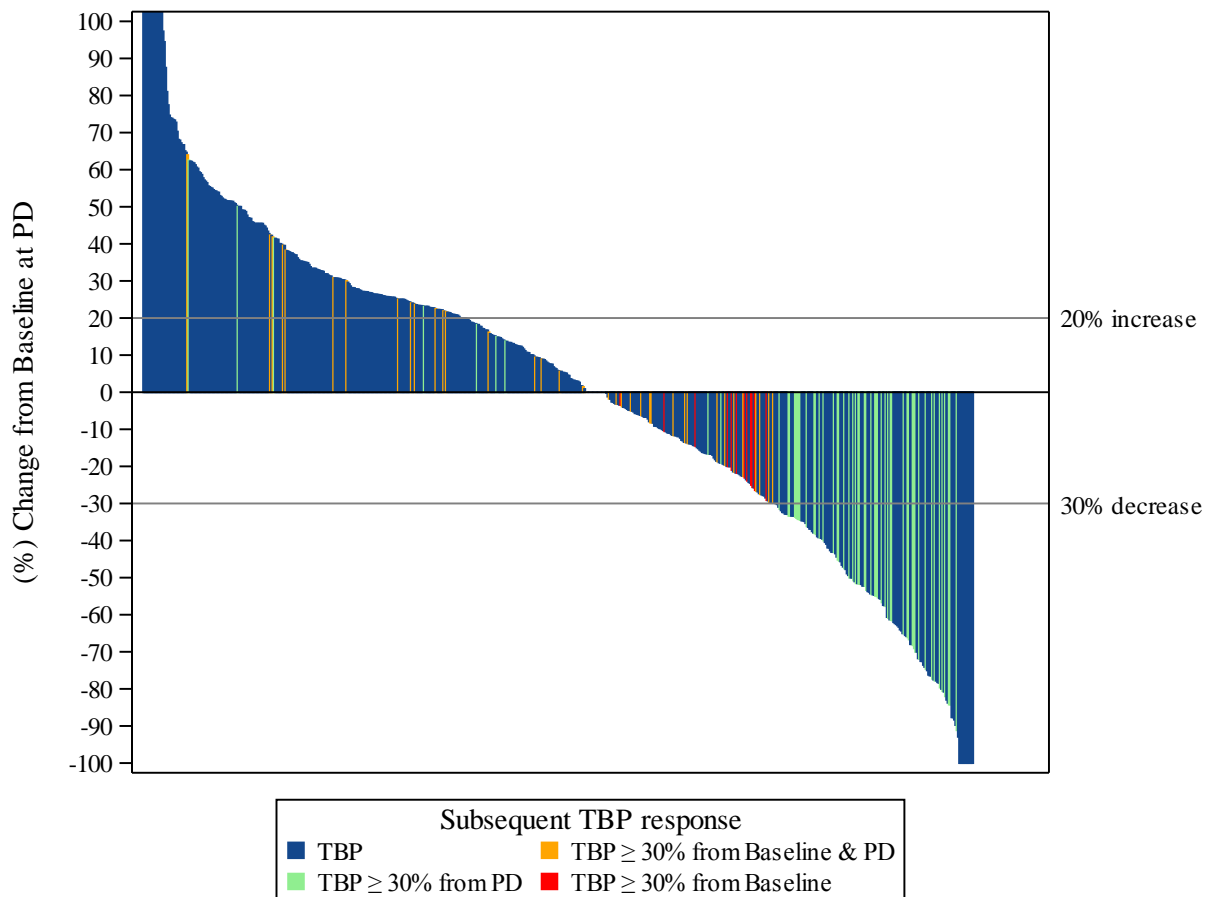

**S3A:** Waterfall plot for all patients TBP (n=692) at the time of progressive disease showing those in blue that did not have subsequent tumor response  $\geq$ 30% from baseline during their TBP, those in red that had subsequent tumor response from baseline (n=20), those in green that had subsequent tumor response from PD (n=58), and those in orange that had both (n=37). Those with no assessed target tumor burden at time of progression are blank.

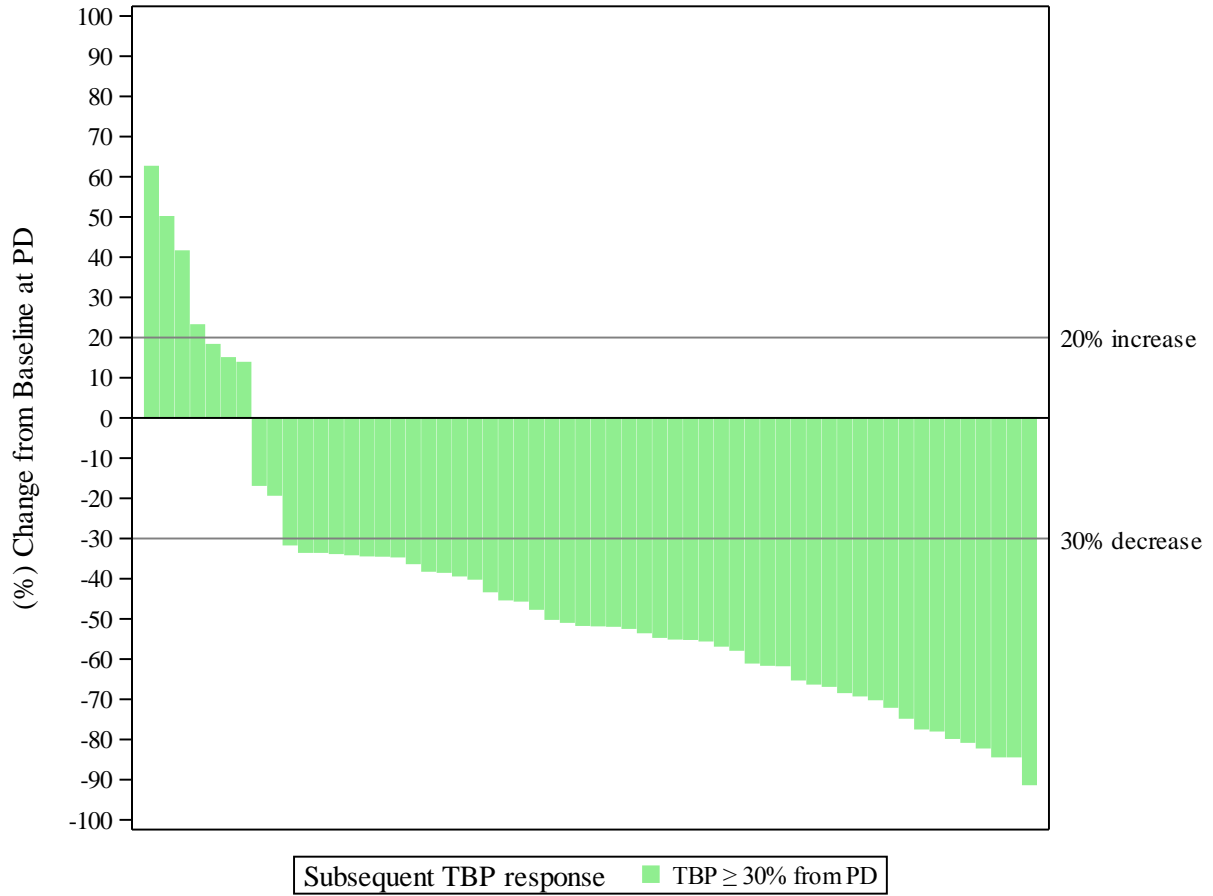

**S3B:** Waterfall plot of change from baseline at the time of progressive disease for TBP patients having subsequent tumor response  $\geq 30\%$  from PD level tumor burden (n=58).

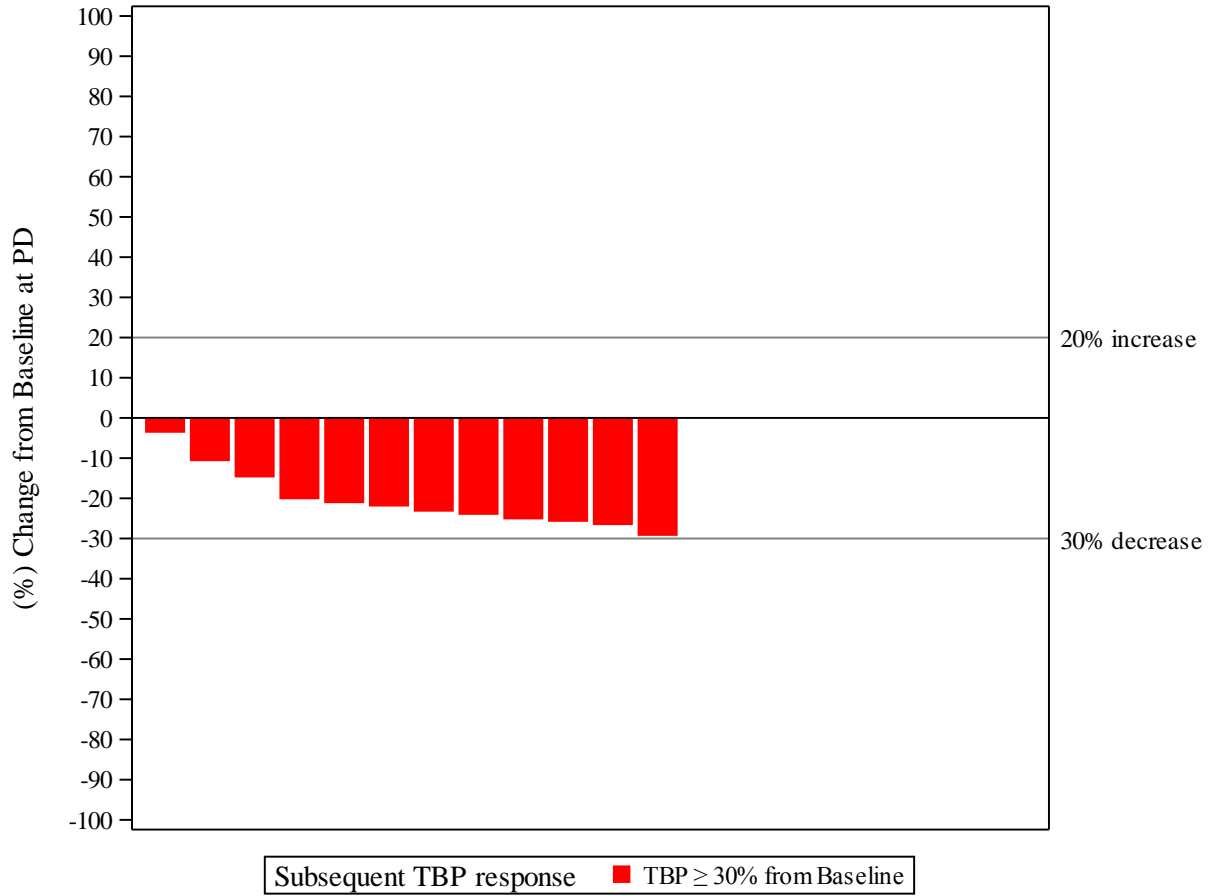

**S3C:** Waterfall plot of change from baseline at the time of progressive disease for TBP patients having subsequent tumor response  $\geq 30\%$  from baseline level tumor burden (n=20). Eight of these patients did not have PD level tumor burden assessed.

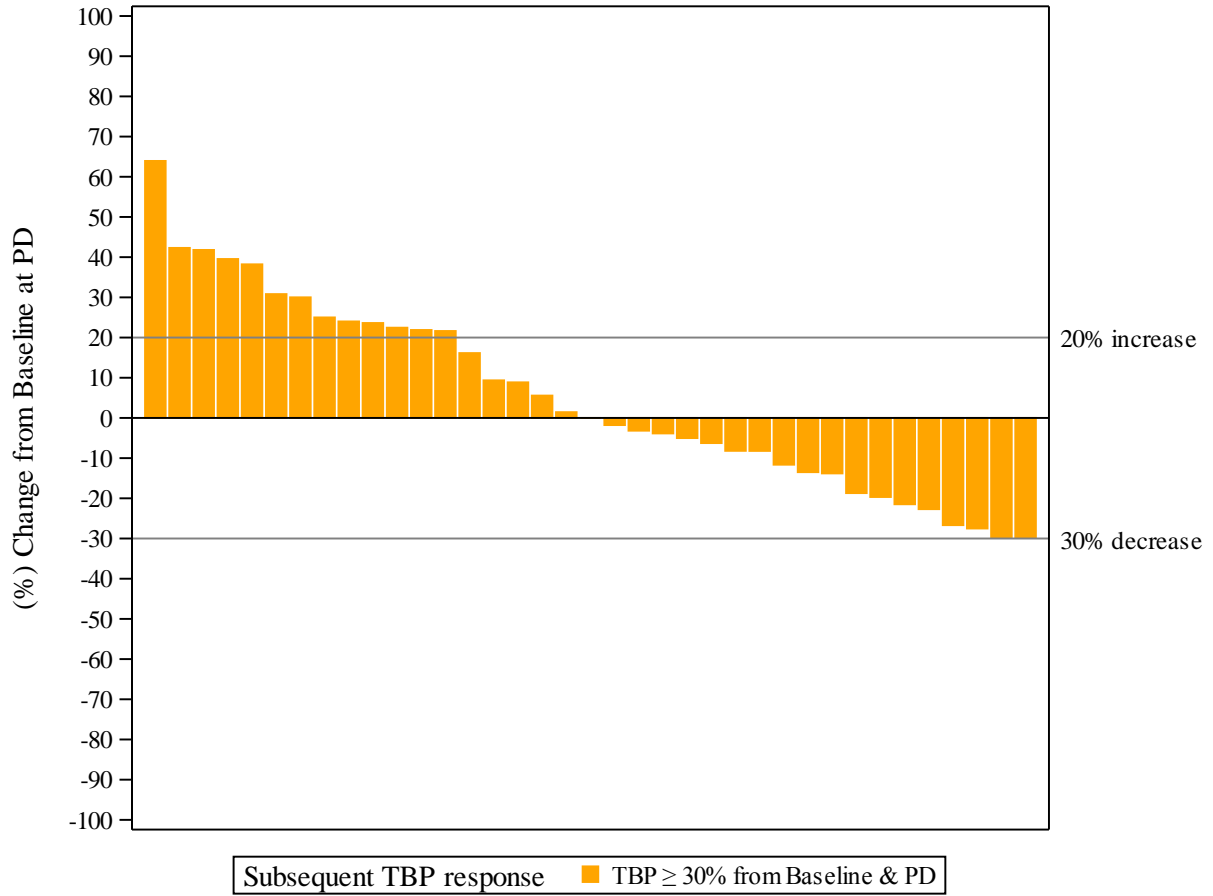

**S3D:** Waterfall plot of change from baseline at the time of progressive disease for TBP patients having subsequent tumor response  $\geq 30\%$  from both baseline and PD level tumor burden (n=37).

**Appendix Figure S4: Patients Experiencing Target Tumor Response After Treatment Beyond Progression**

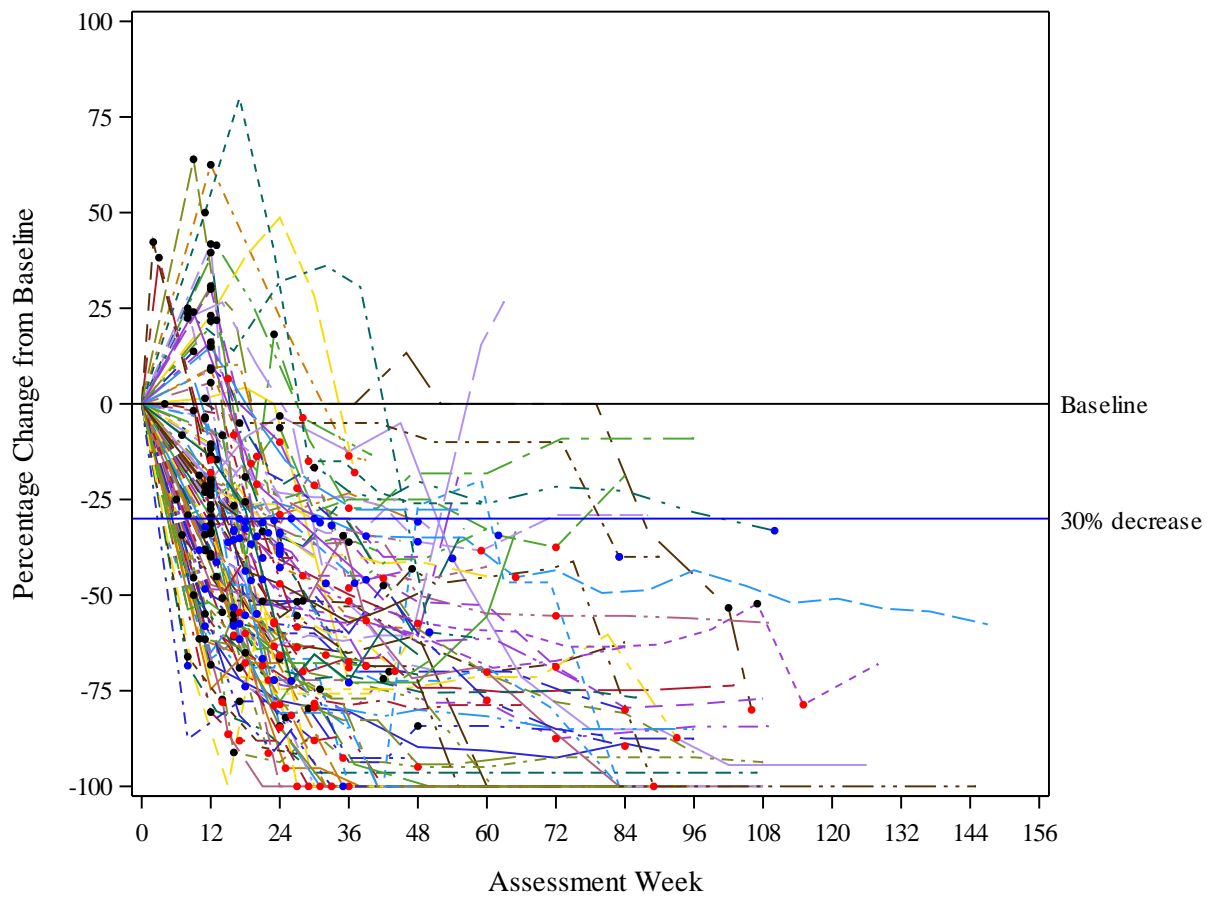

**S4A:** Spider plot for all n=115 patients who progressed per RECIST v1.1 (black circle) and exhibited subsequent response ( $\geq 30\%$  reduction in tumor burden) in reference to baseline (blue circle) or in reference to Progressive Disease (red circle).



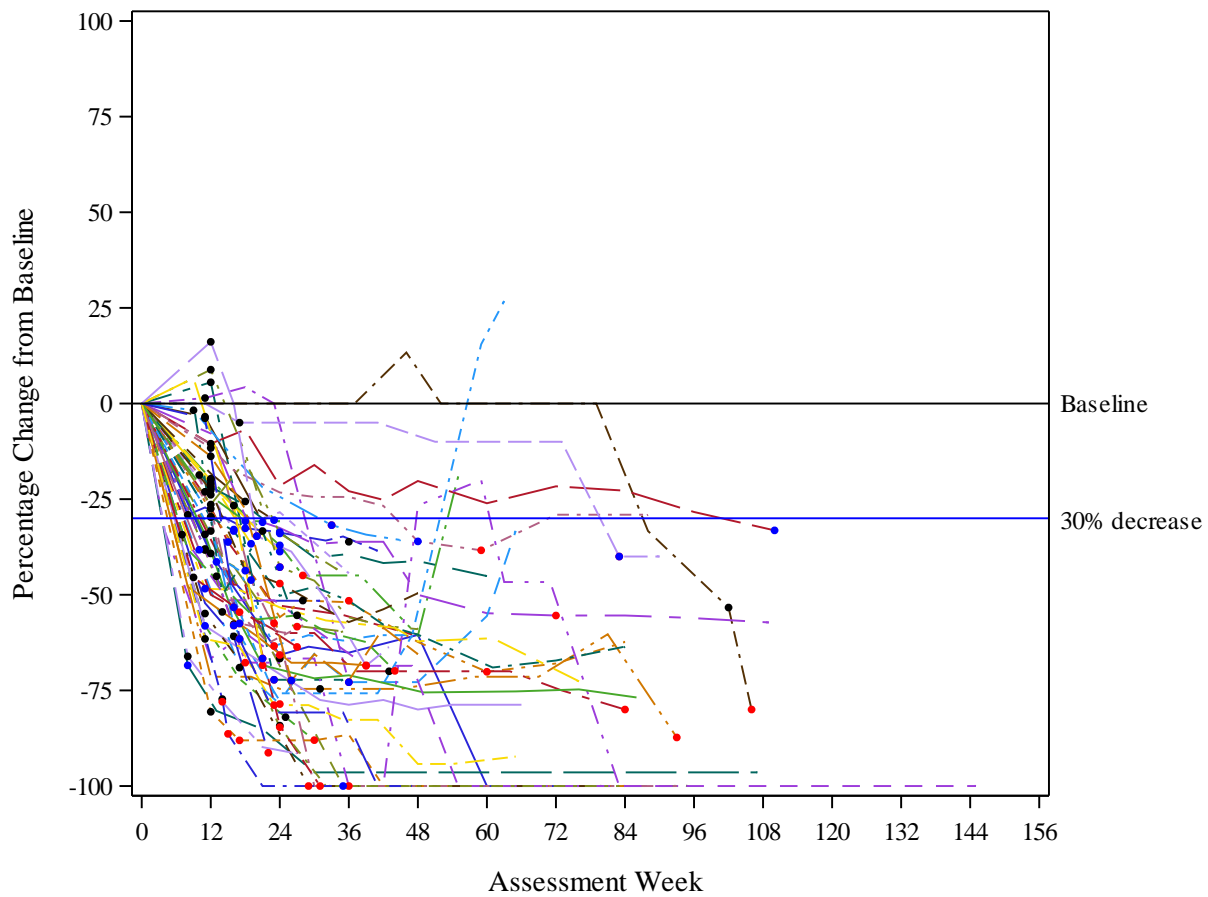

**S4B:** Spider plot for all n=61 patients who progressed solely by new lesion per RECIST v1.1 (black circle) and exhibited subsequent response ( $\geq 30\%$  reduction in tumor burden) in reference to baseline (blue circle) or in reference to Progressive Disease (red circle).

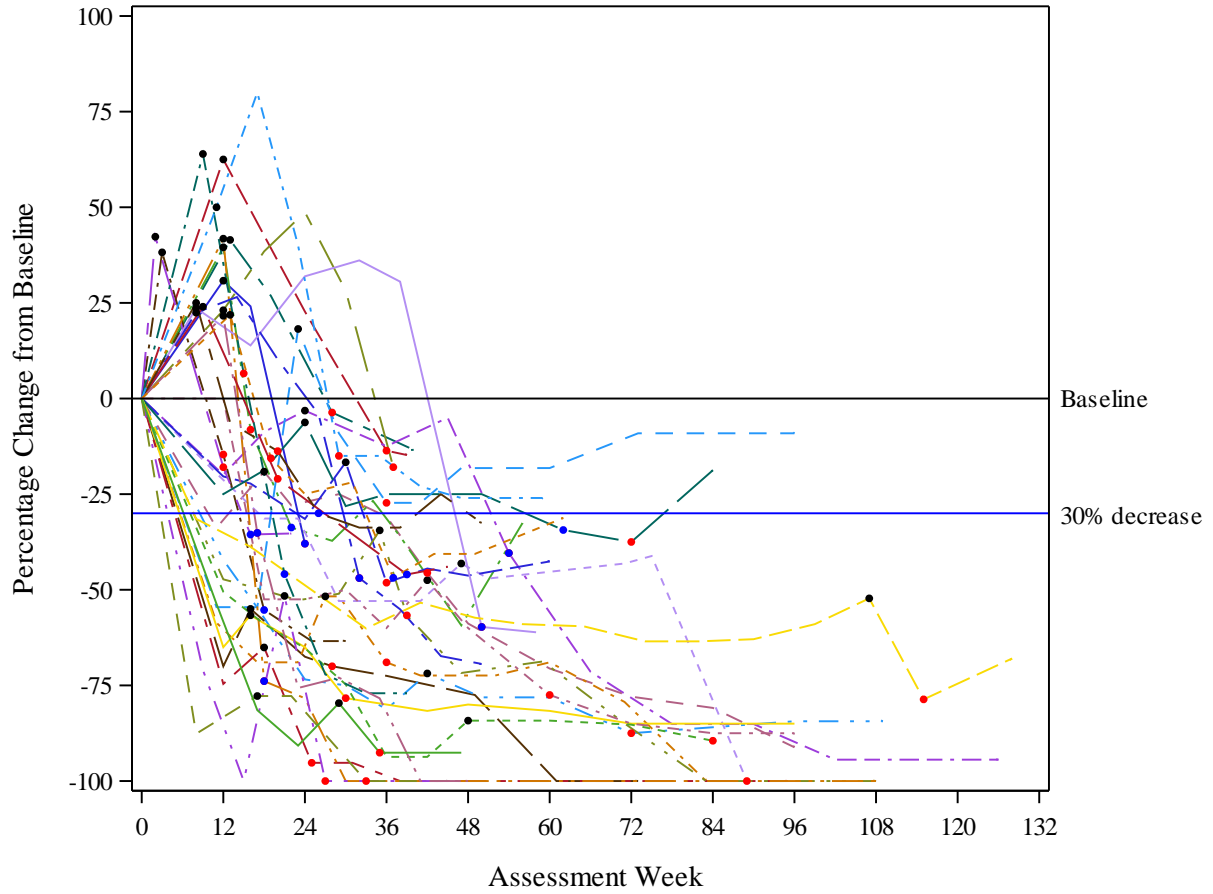

**S4C:** Spider plot for all n=34 patients who progressed by target tumor burden per RECIST v1.1 (black circle) and exhibited subsequent response ( $\geq 30\%$  reduction in tumor burden) in reference to baseline (blue circle) or in reference to Progressive Disease (red circle). Four patients had combination progression (target/new (n=1), target/non-target (n=1), and target/non-target/new (n=2)).

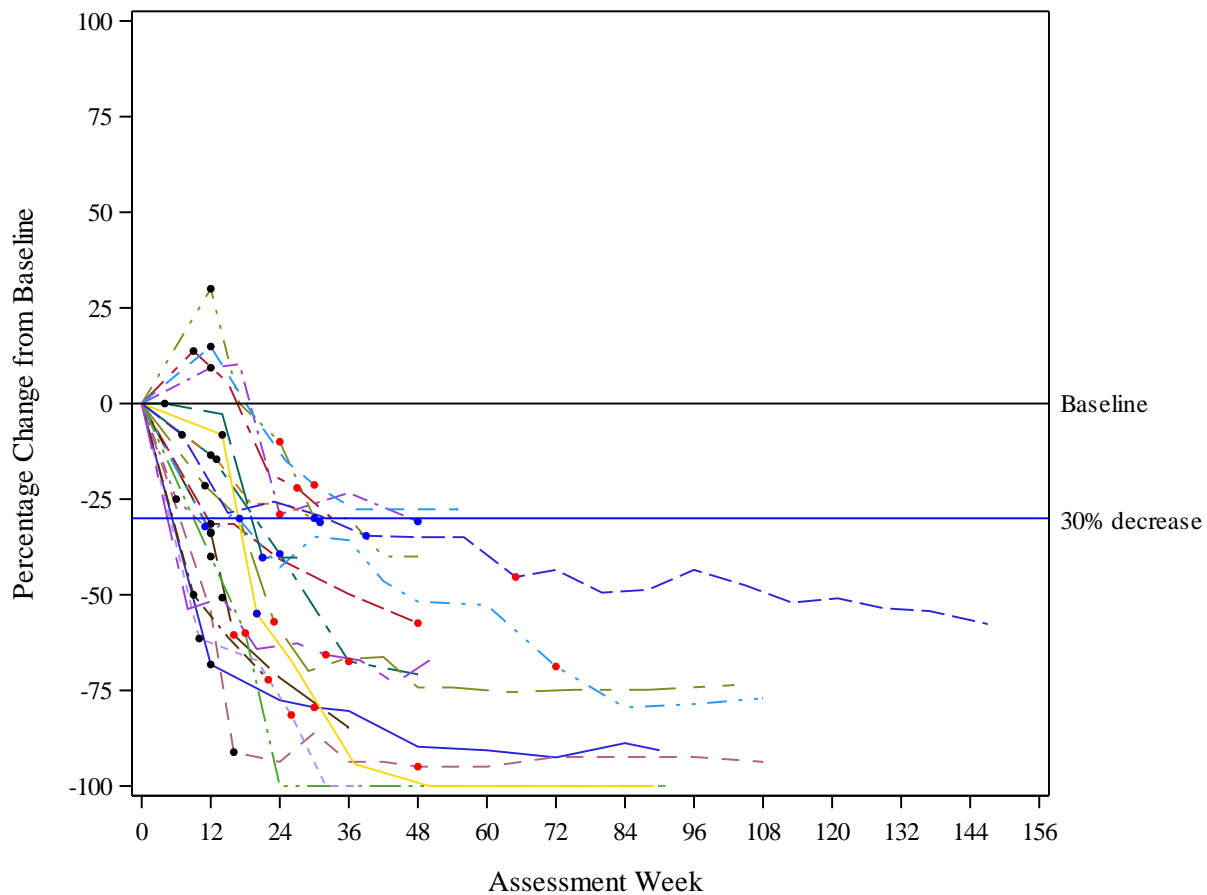

**S4D:** Spider plot for n=20 patients who progressed by non-target (n=10) or combination non-target/new lesion (n=10) per RECIST v1.1 (black circle) and exhibited subsequent response ( $\geq 30\%$  reduction in tumor burden) in reference to baseline (blue circle) or in reference to Progressive Disease (red circle). The patient above the 20% threshold did not have an absolute increase of 5 mm but did have non-target unequivocal progression.

**Appendix Figure S5: Percent Change in Tumor Burden from baseline by visit for Patients Progressing due to Target Lesion Increase and Continuing Treatment Beyond Progression**

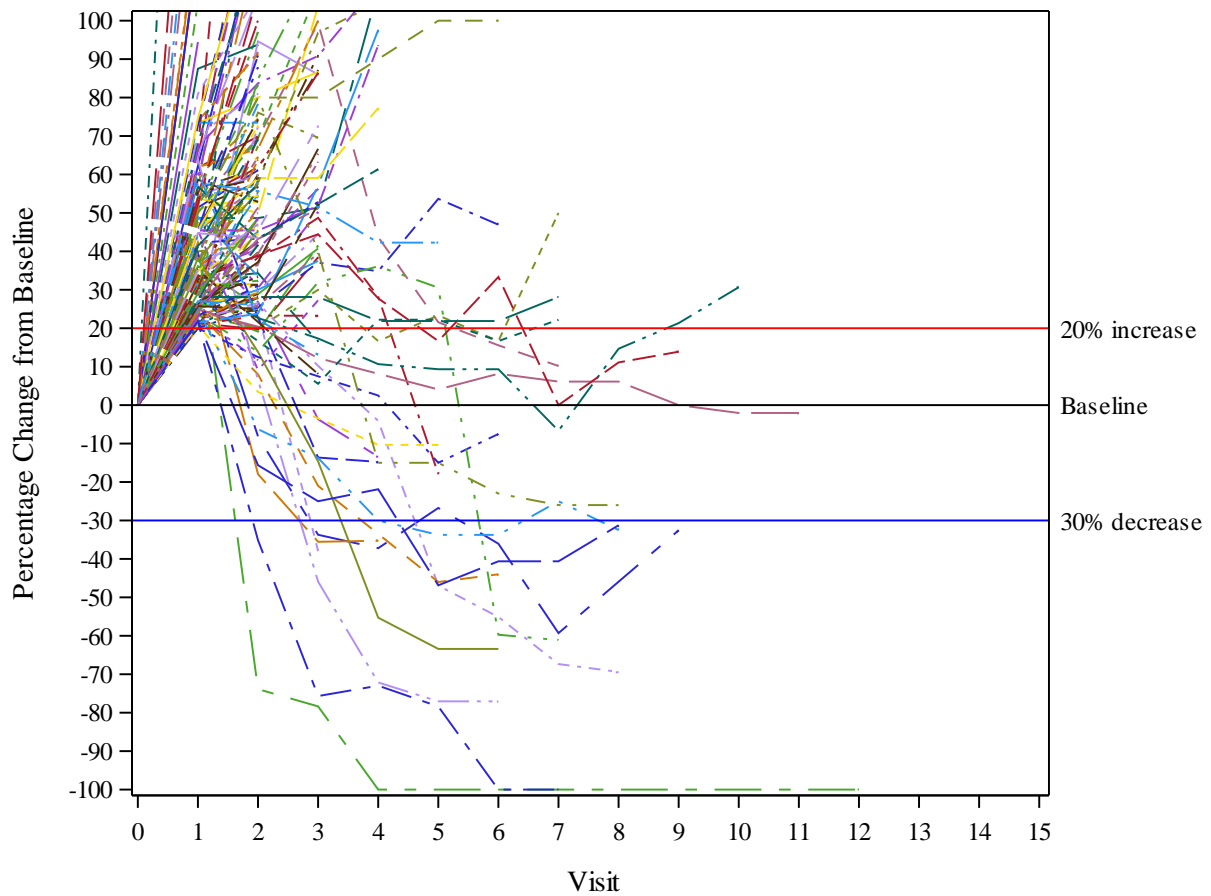

**S5A:** Spider plot demonstrating percentage change in tumor burden from baseline by visit number for all n=176 patients who progressed at first assessment due to target lesion progression and were continued on anti PD-1 agent with at least one subsequent assessment. Of those 176 patients, 133 had subsequent increased or unchanged target lesion tumor burden and 43 had exhibited any reduction in tumor burden, including 16 who had a decrease in tumor burden of  $\geq 30\%$  from their tumor burden at the time of RECIST-defined PD. Ten patients decreased tumor burden from the 20% PD level but not back to baseline, n=21 decreased below their baseline level and n=12 patients ultimately reduced tumor burden to  $\geq 30\%$  of baseline burden.

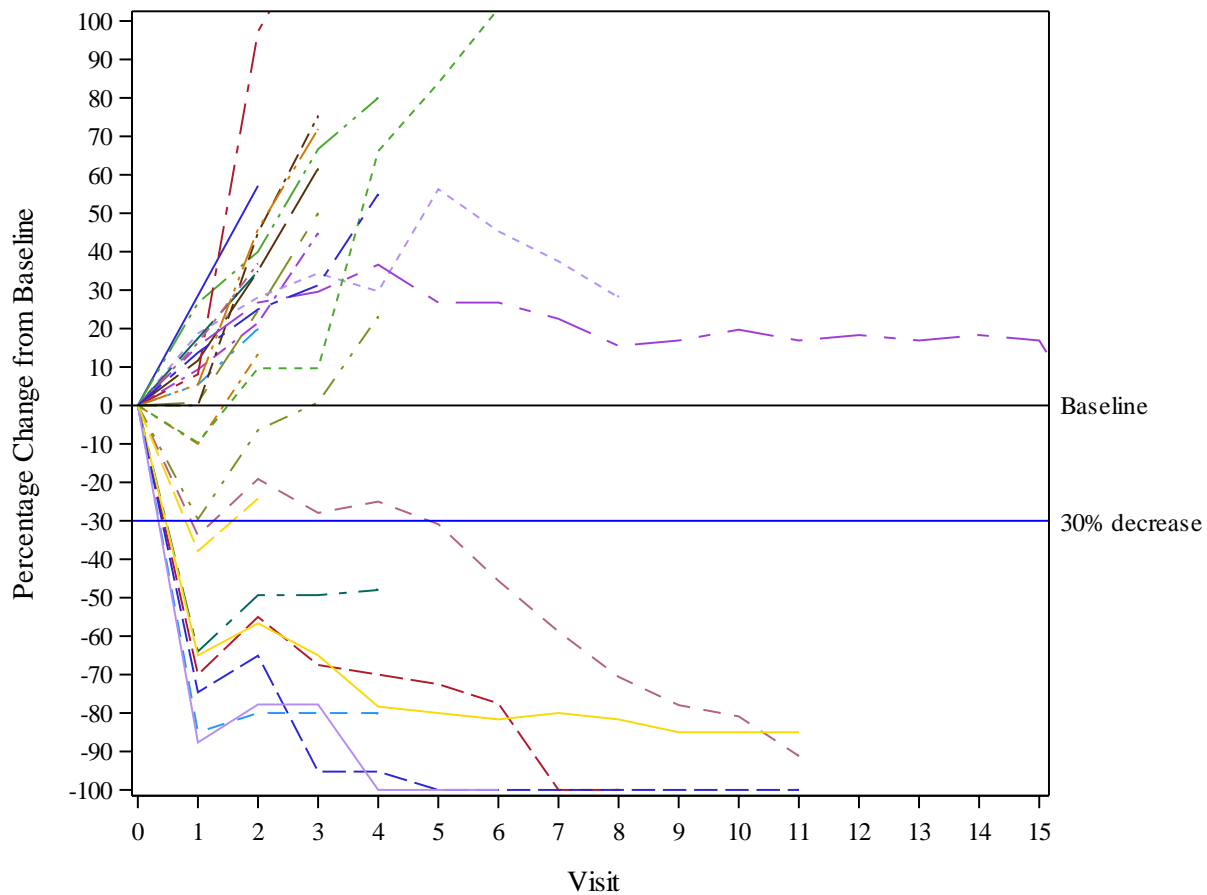

**S5B:** Spider plot for all n=25 patients who progressed at second assessment due to target lesion progression (some of these patients also experienced simultaneous progression with new lesions (n=1), in non-target lesions (n=6), and in target, new, and non-target lesions (n=2)) and were continued on anti PD-1 agent demonstrating percentage change in tumor burden from baseline by visit number

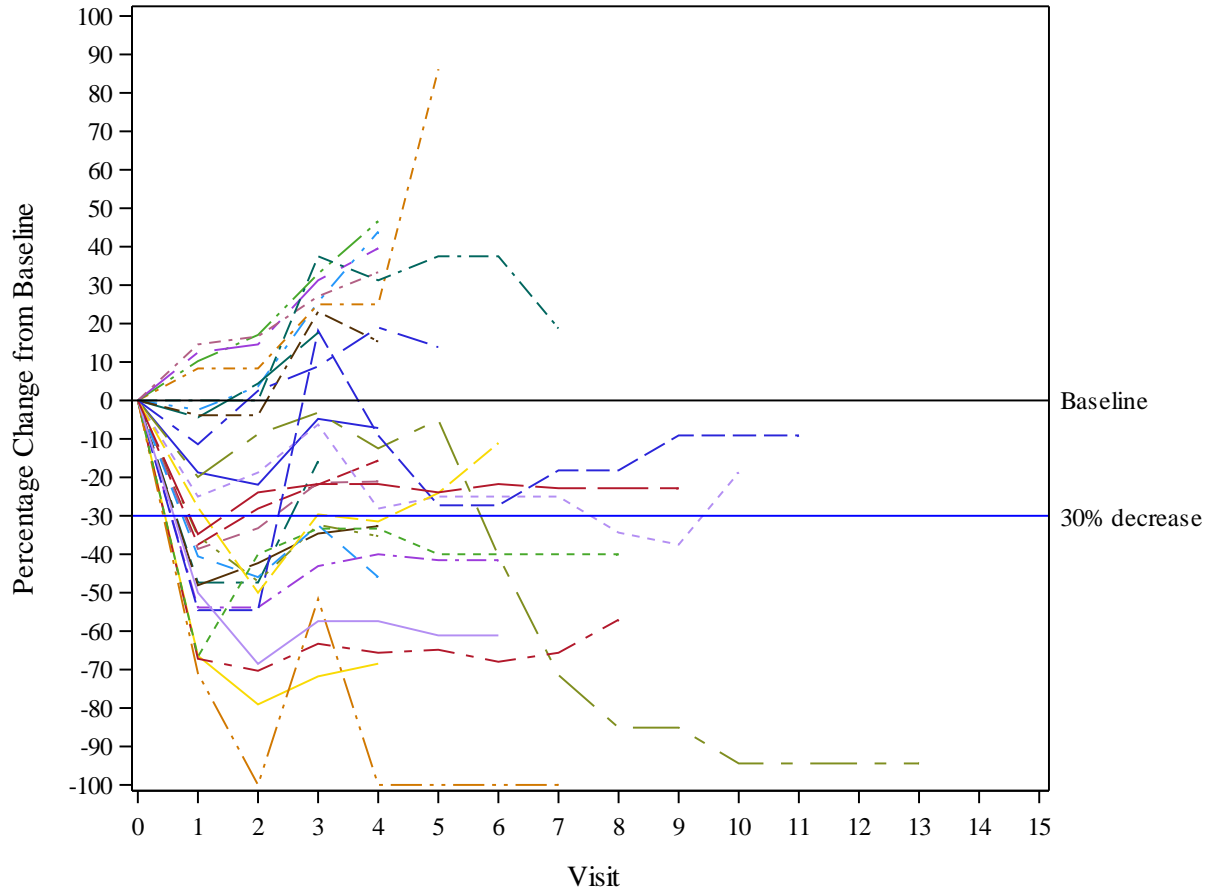

**S5C:** Spider plot for all n=27 patients who progressed at third assessment due to target lesion progression (some of these patient also experienced simultaneous progression with new lesions (n=3) and in non-target lesions (n=2)) and were continued on anti PD-1 agent demonstrating percentage change in tumor burden from baseline by visit number

## Tables

**Appendix Table S1: Classification of Site of New Lesion Progressive Disease by Mutually Exclusive Categories**

| Occurrence of visceral lesion (e.g. lung and/or liver) | Occurrence of CNS (or leptomeningeal) lesion | Occurrence of other lesion (e.g. lymph node) | Category         |
|--------------------------------------------------------|----------------------------------------------|----------------------------------------------|------------------|
| Yes                                                    | Yes                                          | Yes or No                                    | CNS and Visceral |
| No                                                     | Yes                                          | Yes or No                                    | CNS              |
| Yes                                                    | No                                           | Yes or No                                    | Visceral         |
| No                                                     | No                                           | Yes                                          | Non-Visceral     |

Abbreviations: CNS, central nervous system

**Appendix Table S2: Location of New Lesion at Time of Progression\***

|       | CNS<br>n (%) | CNS and Visceral<br>n (%) | Non-Visceral<br>n (%) | Visceral<br>n (%) | Not Reported<br>n (%) | Total |
|-------|--------------|---------------------------|-----------------------|-------------------|-----------------------|-------|
| noTBP | 38 (21.2)    | 4 (2.2)                   | 64 (35.8)             | 70 (39.1)         | 3 (1.7)               | 179   |
| TBP   | 19 (7.7)     | 1 (0.4)                   | 124 (50.0)            | 97 (39.1)         | 7 (2.8)               | 248   |
| Total | 57           | 5                         | 188                   | 167               | 10                    | 427   |

Abbreviations: TBP, treatment beyond progression

\*Among those patients who progressed due only to new lesion



**Appendix Table S3: Patients Experiencing Target Tumor Response After Treatment Beyond Progression**

| Confirmed BOR prior to PD                      | Reason for Progression    | Week of PD Assessment | % change from baseline at PD | Best % change from baseline post PD | Best % change from PD | Best % change from nadir | Weeks on treatment beyond progression |
|------------------------------------------------|---------------------------|-----------------------|------------------------------|-------------------------------------|-----------------------|--------------------------|---------------------------------------|
| <b>≥30% Reduction from Baseline during TBP</b> |                           |                       |                              |                                     |                       |                          |                                       |
| PD                                             | New Lesion                | 12                    | N/A                          | -100                                | N/A                   | -100                     | 27                                    |
| PD                                             | New Lesion                | 12                    | N/A                          | -100                                | N/A                   | -100                     | 16                                    |
| PD                                             | New Lesion                | 2                     | N/A                          | -96.43                              | N/A                   | -96.43                   | 105                                   |
| PD                                             | New Lesion                | 0                     | N/A                          | -80                                 | N/A                   | -80                      | 66                                    |
| PD                                             | New Lesion                | 8                     | N/A                          | -72.61                              | N/A                   | -72.61                   | 68                                    |
| PD                                             | New Lesion                | 0                     | N/A                          | -60.39                              | N/A                   | -60.39                   | 46                                    |
| PD                                             | New Lesion                | 12                    | N/A                          | -51.56                              | N/A                   | -51.56                   | 10                                    |
| PD                                             | New Lesion                | 12                    | -21.8                        | -45.12                              | -29.82                | -29.82                   | 72                                    |
| PD                                             | New Lesion                | 12                    | -23.86                       | -44.32                              | -26.87                | -26.87                   | 27                                    |
| PD                                             | New Lesion                | 12                    | -26.42                       | -43.4                               | -23.08                | -23.08                   | 20                                    |
| PD                                             | New Lesion                | 12                    | -20.97                       | -38.71                              | -22.45                | -22.45                   | 15                                    |
| PD                                             | New Lesion                | 8                     | -29.09                       | -38.5                               | -13.27                | -13.27                   | 32                                    |
| PD                                             | New Lesion                | 8                     | N/A                          | -38.24                              | N/A                   | -38.24                   | 4                                     |
| PD                                             | New Lesion                | 12                    | -20                          | -36.67                              | -20.83                | -20.83                   | 9                                     |
| PD                                             | New Lesion                | 12                    | -10.51                       | -33.16                              | -25.32                | -25.32                   | 94                                    |
| PD                                             | Non-Target                | 6                     | -25                          | -32.14                              | -9.52                 | -9.52                    | 1                                     |
| PD                                             | Non-Target and New Lesion | 13                    | -14.56                       | -31.07                              | -19.32                | -19.32                   | 12                                    |
| PD                                             | New Lesion                | 11                    | -3.45                        | -31.03                              | -28.57                | -28.57                   | 7                                     |
| PD                                             | New Lesion                | 11                    | -23.08                       | -30.77                              | -10                   | -10                      | 14                                    |
| SD                                             | New Lesion                | 18                    | -25.61                       | -30.49                              | -6.56                 | -6.56                    | 8                                     |

| Confirmed BOR prior to PD                             | Reason for Progression    | Week of PD Assessment | % change from baseline at PD | Best % change from baseline post PD | Best % change from PD | Best % change from nadir | Weeks on treatment beyond progression |
|-------------------------------------------------------|---------------------------|-----------------------|------------------------------|-------------------------------------|-----------------------|--------------------------|---------------------------------------|
| <b>≥30% Reduction from Baseline and PD during TBP</b> |                           |                       |                              |                                     |                       |                          |                                       |
| PD                                                    | Non-Target and New Lesion | 14                    | -8.2                         | -100                                | -100                  | -100                     | 6                                     |
| PD                                                    | Target                    | 12                    | 41.79                        | -100                                | -100                  | -100                     | 99                                    |
| PD                                                    | Target                    | 12                    | 21.62                        | -100                                | -100                  | -100                     | 38                                    |
| PD                                                    | New Lesion                | 11                    | -3.85                        | -100                                | -100                  | -100                     | 49                                    |
| SD                                                    | Target                    | 24                    | -3.17                        | -94.41                              | -94.23                | -93.02                   | 112                                   |
| PD                                                    | New Lesion                | 12                    | -29.63                       | -77.78                              | -68.42                | -68.42                   | 51                                    |
| PD                                                    | Target/New Lesion         | 9                     | 63.93                        | -77.05                              | -86                   | -77.05                   | 32                                    |
| PD                                                    | Non-Target                | 11                    | -21.47                       | -75.46                              | -68.75                | -68.75                   | 56                                    |
| PD                                                    | New Lesion                | 11                    | 1.43                         | -72.86                              | -73.24                | -72.86                   | 22                                    |
| PD                                                    | New Lesion                | 12                    | -13.79                       | -72.41                              | -68                   | -68                      | 36                                    |
| PD                                                    | New Lesion                | 12                    | 5.56                         | -72.22                              | -73.68                | -72.22                   | 21                                    |
| PD                                                    | Non-Target                | 12                    | -13.48                       | -70.79                              | -66.23                | -66.23                   | 42                                    |
| PD                                                    | Target                    | 8                     | 22.45                        | -69.39                              | -75                   | -69.39                   | 47                                    |
| PD                                                    | New Lesion                | 12                    | -29.69                       | -69.01                              | -55.93                | -55.93                   | 81                                    |
| PD                                                    | New Lesion                | 12                    | 16.13                        | -68.55                              | -72.92                | -68.55                   | 25                                    |
| SD                                                    | New Lesion                | 16                    | -26.67                       | -66.67                              | -54.55                | -54.55                   | 5                                     |
| PD                                                    | Target                    | 3                     | 38.21                        | -63.41                              | -73.53                | -63.41                   | 30                                    |
| PD                                                    | New Lesion                | 10                    | -18.69                       | -62.62                              | -54.02                | -54.02                   | 24                                    |
| PD                                                    | Target                    | 8                     | 23.61                        | -61.11                              | -68.54                | -61.11                   | 57                                    |
| PD                                                    | New Lesion                | 12                    | -19.66                       | -60.67                              | -51.05                | -51.05                   | 32                                    |
| PD                                                    | New Lesion                | 12                    | -27.5                        | -60                                 | -44.83                | -44.83                   | 22                                    |
| PD                                                    | Target                    | 12                    | 39.53                        | -59.3                               | -70.83                | -59.3                    | 18                                    |
| PD                                                    | New Lesion                | 12                    | 8.85                         | -59                                 | -62.33                | -59                      | 43                                    |
| PD                                                    | Non-Target and New Lesion | 7                     | -8.18                        | -57.62                              | -53.85                | -53.85                   | 88                                    |

| Confirmed BOR prior to PD                | Reason for Progression       | Week of PD Assessment | % change from baseline at PD | Best % change from baseline post PD | Best % change from PD | Best % change from nadir | Weeks on treatment beyond progression |
|------------------------------------------|------------------------------|-----------------------|------------------------------|-------------------------------------|-----------------------|--------------------------|---------------------------------------|
| PD                                       | New Lesion                   | 12                    | -22.69                       | -57.14                              | -44.57                | -44.57                   | 44                                    |
| PD                                       | Target                       | 13                    | 21.88                        | -46.88                              | -56.41                | -46.88                   | 55                                    |
| PD                                       | Target/Non-Target/New Lesion | 9                     | 24                           | -46                                 | -56.45                | -46                      | 39                                    |
|                                          |                              |                       |                              |                                     |                       |                          |                                       |
| PD                                       | Non-Target and New Lesion    | 4                     | 0                            | -40.28                              | -40.28                | -40.28                   | 25                                    |
| SD                                       | New Lesion                   | 17                    | -5                           | -40                                 | -36.84                | -36.84                   | 64                                    |
| PD                                       | Non-Target                   | 12                    | 30                           | -40                                 | -53.85                | -40                      | 45                                    |
| PD                                       | New Lesion                   | 12                    | -11.63                       | -38.37                              | -30.26                | -30.26                   | 81                                    |
| PD                                       | Target                       | 12                    | 30.8                         | -37.95                              | -52.56                | -37.95                   | 15                                    |
| SD                                       | Target                       | 24                    | -6.25                        | -37.5                               | -33.33                | -16.67                   | 71                                    |
| PD                                       | New Lesion                   | 9                     | -1.77                        | -35.69                              | -34.53                | -34.53                   | 32                                    |
| PD                                       | Target                       | 2                     | 42.3                         | -35.55                              | -54.71                | -35.55                   | 20                                    |
| PD                                       | Target/Non-Target            | 8                     | 25                           | -33.75                              | -47                   | -33.75                   | 46                                    |
| PD                                       | Non-Target                   | 12                    | 9.35                         | -30.84                              | -36.75                | -30.84                   | 36                                    |
| <b>≥30% Reduction from PD during TBP</b> |                              |                       |                              |                                     |                       |                          |                                       |
| PD                                       | New Lesion                   | 12                    | -39.2                        | -100                                | -100                  | -100                     | 69                                    |
| SD                                       | Target                       | 16                    | -55                          | -100                                | -100                  | -100                     | 63                                    |
| PR                                       | Target                       | 27                    | -51.72                       | -100                                | -100                  | -100                     | 56                                    |
| PR                                       | Target                       | 47                    | -43.14                       | -100                                | -100                  | -100                     | 28                                    |
| SD                                       | Target                       | 18                    | -65.08                       | -100                                | -100                  | -100                     | 79                                    |
| PR                                       | New Lesion                   | 24                    | -66.67                       | -100                                | -100                  | -100                     | 77                                    |
| PR                                       | Target                       | 35                    | -34.46                       | -100                                | -100                  | -100                     | 53                                    |
| PD                                       | New Lesion                   | 12                    | -80.6                        | -100                                | -100                  | -100                     | 81                                    |
| SD                                       | New Lesion                   | 24                    | -84.21                       | -100                                | -100                  | -100                     | 3                                     |

| Confirmed BOR prior to PD | Reason for Progression    | Week of PD Assessment | % change from baseline at PD | Best % change from baseline post PD | Best % change from PD | Best % change from nadir | Weeks on treatment beyond progression |
|---------------------------|---------------------------|-----------------------|------------------------------|-------------------------------------|-----------------------|--------------------------|---------------------------------------|
| PD                        | Non-Target                | 12                    | -40                          | -100                                | -100                  | -100                     | 14                                    |
| PD                        | Non-Target and New Lesion | 10                    | -61.43                       | -100                                | -100                  | -100                     | 26                                    |
| PD                        | New Lesion                | 11                    | -54.9                        | -100                                | -100                  | -100                     | 49                                    |
| PD                        | New Lesion                | 7                     | -34.29                       | -100                                | -100                  | -100                     | 87                                    |
| PD                        | New Lesion                | 16                    | -57.69                       | -100                                | -100                  | -100                     | 56                                    |
| PD                        | New Lesion                | 14                    | -77.27                       | -100                                | -100                  | -100                     | 22                                    |
| PR                        | Target                    | 21                    | -51.61                       | -100                                | -100                  | .                        | 29                                    |
| SD                        | Target                    | 17                    | -77.78                       | -100                                | -100                  | -100                     | 34                                    |
| SD                        | Non-Target                | 16                    | -91.14                       | -94.94                              | -42.86                | -42.86                   | 19                                    |
| PD                        | New Lesion                | 11                    | -61.54                       | -94.23                              | -85                   | -85                      | 53                                    |
| PR                        | Target                    | 29                    | -79.63                       | -92.59                              | -63.64                | -20                      | 18                                    |
| PD                        | Non-Target and New Lesion | 12                    | -68.22                       | -92.52                              | -76.47                | -76.47                   | 80                                    |
| PD                        | New Lesion                | 8                     | -66.1                        | -91.53                              | -75                   | -75                      | 23                                    |
| SD                        | New Lesion                | 16                    | -60.87                       | -91.3                               | -77.78                | -77.78                   | 6                                     |
| SD                        | Target                    | 18                    | -19.12                       | -91.18                              | -89.09                | -86.67                   | 87                                    |
| PR                        | Target                    | 48                    | -84.21                       | -89.47                              | -33.33                | 66.67                    | 38                                    |
| PR                        | New Lesion                | 25                    | -82                          | -88                                 | -33.33                | -33.33                   | 2                                     |
| PR                        | Target                    | 42                    | -71.88                       | -87.5                               | -55.56                | -33.33                   | 63                                    |
| PR                        | Target                    | 42                    | -47.5                        | -87.5                               | -76.19                | -68.75                   | 54                                    |
| PR                        | New Lesion                | 31                    | -74.6                        | -87.3                               | -50                   | -50                      | 71                                    |
| SD                        | Target                    | 16                    | -56.67                       | -85                                 | -65.38                | -57.14                   | 62                                    |
| PD                        | Non-Target and New Lesion | 12                    | -33.63                       | -84.72                              | -76.98                | -76.98                   | 33                                    |
| PR                        | New Lesion                | 43                    | -70                          | -80                                 | -33.33                | -33.33                   | 30                                    |

| Confirmed BOR prior to PD | Reason for Progression    | Week of PD Assessment | % change from baseline at PD | Best % change from baseline post PD | Best % change from PD | Best % change from nadir | Weeks on treatment beyond progression |
|---------------------------|---------------------------|-----------------------|------------------------------|-------------------------------------|-----------------------|--------------------------|---------------------------------------|
| SD                        | New Lesion                | 102                   | -53.33                       | -80                                 | -57.14                | -57.14                   | 3                                     |
| PD                        | Non-Target and New Lesion | 12                    | -33.93                       | -79.46                              | -68.92                | -68.92                   | 72                                    |
| PR                        | Target                    | 107                   | -52.25                       | -78.65                              | -55.29                | -41.54                   | 57                                    |
| PD                        | New Lesion                | 17                    | -69.05                       | -78.57                              | -30.77                | -30.77                   | 5                                     |
| PD                        | New Lesion                | 11                    | -34.21                       | -76.84                              | -64.8                 | -64.8                    | 64                                    |
| PD                        | New Lesion                | 12                    | -33.33                       | -75.76                              | -63.64                | -63.64                   | 50                                    |
| SD                        | Non-Target                | 14                    | -50.75                       | -73.13                              | -45.45                | -41.94                   | 40                                    |
| PD                        | Non-Target                | 9                     | -50                          | -72.22                              | -44.44                | -44.44                   | 18                                    |
| SD                        | New Lesion                | 28                    | -51.52                       | -70.13                              | -38.39                | -32.35                   | 63                                    |
| PR                        | New Lesion                | 27                    | -55.38                       | -69.89                              | -32.53                | -30.86                   | 6                                     |
| SD                        | New Lesion                | 14                    | -54.49                       | -68.44                              | -30.66                | -30.66                   | 27                                    |
| PD                        | New Lesion                | 13                    | -45.16                       | -67.74                              | -41.18                | -41.18                   | 12                                    |
| PD                        | New Lesion                | 9                     | -45.45                       | -63.64                              | -33.33                | -33.33                   | 18                                    |
| PD                        | New Lesion                | 11                    | -38.03                       | -63.38                              | -40.91                | -40.91                   | 51                                    |
| PD                        | New Lesion                | 11                    | -38.3                        | -59.57                              | -34.48                | -34.48                   | 19                                    |
| SD                        | New Lesion                | 21                    | -33.33                       | -58.33                              | -37.5                 | -16.67                   | 3                                     |
| PD                        | Non-Target                | 12                    | -31.48                       | -57.41                              | -37.84                | -37.84                   | 45                                    |
| PR                        | New Lesion                | 36                    | -36.14                       | -57.23                              | -33.02                | -32.38                   | 69                                    |
| SD                        | Target                    | 30                    | -16.67                       | -48.15                              | -37.78                | -24.32                   | 32                                    |
| PD                        | Non-Target and New Lesion | 9                     | 13.73                        | -29.9                               | -38.36                | -29.9                    | 25                                    |
| PD                        | Non-Target and New Lesion | 12                    | 14.89                        | -27.66                              | -37.04                | -27.66                   | 46                                    |
| PR                        | Target                    | 23                    | 18.18                        | -27.27                              | -38.46                | 60                       | 80                                    |
| PD                        | Target                    | 11                    | 50                           | -26                                 | -50.67                | -26                      | 49                                    |

| <b>Confirmed BOR prior to PD</b> | <b>Reason for Progression</b> | <b>Week of PD Assessment</b> | <b>% change from baseline at PD</b> | <b>Best % change from baseline post PD</b> | <b>Best % change from PD</b> | <b>Best % change from nadir</b> | <b>Weeks on treatment beyond progression</b> |
|----------------------------------|-------------------------------|------------------------------|-------------------------------------|--------------------------------------------|------------------------------|---------------------------------|----------------------------------------------|
| PD                               | Target                        | 12                           | 23.08                               | -17.95                                     | -33.33                       | -17.95                          | 129                                          |
| PD                               | Target                        | 12                           | 62.5                                | -14.77                                     | -47.55                       | -14.77                          | 42                                           |
| PD                               | Target/Non-Target/New Lesion  | 13                           | 41.46                               | -13.41                                     | -38.79                       | -13.41                          | 39                                           |

Abbreviations: BOR, best overall response; PD, progressive disease; PR, partial response; SD, stable disease; N/A, Not available;

**Appendix Table S4: Demographics and Disease Characteristics of Patients Treated with Anti PD-1 Antibody with Response from Baseline (n=57)**

| Variable                                                    | Category Value            | TBP, Subsequent Response from Baseline (n=57)<br>n (%) | TBP, No Subsequent Response from Baseline (n=635)<br>n (%) |
|-------------------------------------------------------------|---------------------------|--------------------------------------------------------|------------------------------------------------------------|
| <b>Prior to Anti-PD-1 Therapy</b>                           |                           |                                                        |                                                            |
| <b>Age</b>                                                  | Median (IQR), years       | 62 (52, 68)                                            | 61 (50, 69)                                                |
| <b>Sex</b>                                                  | Female                    | 20 (35.1)                                              | 246 (38.7)                                                 |
|                                                             | Male                      | 37 (64.9)                                              | 389 (61.3)                                                 |
| <b>AJCC Stage at Study Entry</b>                            | Stage III                 | 4 (7.0)                                                | 24 (3.8)                                                   |
|                                                             | Stage IV                  | 42 (73.7)                                              | 514 (80.9)                                                 |
|                                                             | Missing                   | 11 (19.3)                                              | 97 (15.3)                                                  |
| <b>M Stage at Study Entry</b>                               | M0/M1A/M1B                | 13 (22.8)                                              | 161 (25.4)                                                 |
|                                                             | M1C                       | 31 (54.4)                                              | 336 (52.9)                                                 |
|                                                             | Missing                   | 13 (22.8)                                              | 138 (21.7)                                                 |
| <b>Prior Lines of Systemic Therapy for Advanced Disease</b> | 0                         | 29 (50.9)                                              | 303 (47.7)                                                 |
|                                                             | 1                         | 14 (24.6)                                              | 161 (25.4)                                                 |
|                                                             | 2                         | 11 (19.3)                                              | 105 (16.5)                                                 |
|                                                             | ≥3                        | 3 (5.3)                                                | 66 (10.4)                                                  |
| <b>PD-L1 Expression</b>                                     | Negative/Indeterminate    | 15 (26.3)                                              | 197 (31.0)                                                 |
|                                                             | Positive                  | 27 (47.4)                                              | 286 (45.0)                                                 |
|                                                             | Missing                   | 15 (26.3)                                              | 152 (23.9)                                                 |
| <b>BRAF V600 Mutation Status</b>                            | Mutant                    | 14 (24.6)                                              | 171 (26.9)                                                 |
|                                                             | Wild Type                 | 43 (75.4)                                              | 443 (69.8)                                                 |
|                                                             | Missing                   | 0 (0.0)                                                | 21 (3.3)                                                   |
| <b>Baseline ECOG Performance Status</b>                     | 0                         | 45 (78.9)                                              | 487 (76.7)                                                 |
|                                                             | 1                         | 12 (21.1)                                              | 147 (23.1)                                                 |
|                                                             | 2                         | 0 (0.0)                                                | 1 (0.2)                                                    |
| <b>Baseline LDH &gt; ULN Category</b>                       | ≤ULN                      | 36 (63.2)                                              | 415 (65.4)                                                 |
|                                                             | >ULN                      | 21 (36.8)                                              | 211 (33.2)                                                 |
|                                                             | Missing                   | 0 (0.0)                                                | 9 (1.4)                                                    |
| <b>At Time of RECIST-Defined Progression</b>                |                           |                                                        |                                                            |
| <b>ECOG Status Within 28 Days Prior to Progression</b>      | 0                         | 39 (68.4)                                              | 423 (66.6)                                                 |
|                                                             | 1                         | 15 (26.3)                                              | 191 (30.1)                                                 |
|                                                             | 2                         | 0 (0.0)                                                | 7 (1.1)                                                    |
|                                                             | 3                         | 1 (1.8)                                                | 6 (0.9)                                                    |
|                                                             | Missing                   | 2 (3.5)                                                | 8 (1.3)                                                    |
|                                                             | Improvement from baseline | 3 (5.3)                                                | 36 (5.7)                                                   |
|                                                             | Worsening from baseline   | 7 (12.3)                                               | 101 (15.9)                                                 |

| <b>Variable</b>                                         | <b>Category Value</b>               | <b>TBP, Subsequent Response from Baseline (n=57) N (%)</b> | <b>TBP, No Subsequent Response from Baseline (n=635) N (%)</b> |
|---------------------------------------------------------|-------------------------------------|------------------------------------------------------------|----------------------------------------------------------------|
| <b>LDH Category Within 28 Days Prior to Progression</b> | ≤ULN                                | 38 (66.7)                                                  | 397 (62.5)                                                     |
|                                                         | >ULN                                | 17 (29.8)                                                  | 215 (33.9)                                                     |
|                                                         | Missing                             | 2 (3.4)                                                    | 23 (3.6)                                                       |
|                                                         | Improvement to ≤ULN                 | 7 (12.3)                                                   | 65 (10.2)                                                      |
|                                                         | Worsening to >ULN                   | 3 (5.3)                                                    | 69 (10.9)                                                      |
| <b>Reason for Progression</b>                           | Target                              | 11 (19.3)                                                  | 197 (31.0)                                                     |
|                                                         | Non-Target                          | 5 (8.8)                                                    | 61 (9.6)                                                       |
|                                                         | New Lesion                          | 34 (59.6)                                                  | 214 (33.7)                                                     |
|                                                         | Non-Target and New Lesion           | 4 (7.0)                                                    | 46 (7.2)                                                       |
|                                                         | Target + Other                      | 3 (5.4)                                                    | 117 (18.4)                                                     |
|                                                         | Target/Non-Target                   | 1 (1.8)                                                    | 39 (6.1)                                                       |
|                                                         | Target/New Lesion                   | 1 (1.8)                                                    | 38 (6.0)                                                       |
|                                                         | Target/Non-Target/New Lesion        | 1 (1.8)                                                    | 40 (6.3)                                                       |
| <b>Confirmed BOR Prior to Progression</b>               | CR                                  | 0 (0.0)                                                    | 8 (1.3)                                                        |
|                                                         | PR                                  | 0 (0.0)                                                    | 88 (13.9)                                                      |
|                                                         | SD                                  | 5 (8.8)                                                    | 118 (18.6)                                                     |
|                                                         | PD                                  | 52 (91.2)                                                  | 421 (66.3)                                                     |
| <b>Duration of Response Prior to Progression</b>        | Median (IQR), months                | --                                                         | 5.5 (4.0-10.5)                                                 |
| <b>Timing of RECIST PD</b>                              | First Assessment (range week 0-24)  | 52 (91.2)                                                  | 406 (63.9)                                                     |
|                                                         | Second Assessment (range week 6-27) | 3 (5.3)                                                    | 55 (8.7)                                                       |
|                                                         | Third Assessment (range week 18-50) | 2 (3.5)                                                    | 55 (8.7)                                                       |
|                                                         | 12 weeks or less                    | 49 (86.0)                                                  | 393 (61.9)                                                     |
|                                                         | 13 to 16 weeks                      | 4 (7.0)                                                    | 39 (6.1)                                                       |
|                                                         | 17 to 20 weeks                      | 2 (3.5)                                                    | 22 (3.5)                                                       |
|                                                         | 21 to 24 weeks                      | 2 (3.5)                                                    | 53 (8.3)                                                       |
|                                                         | greater than 24 weeks               | 0 (0.0)                                                    | 128 (20.2)                                                     |

Abbreviations: IQR, interquartile range



**Appendix Table S5: Demographics and Disease Characteristics of TBP and NoTBP Patients on Both Arms of Trial CA209066**

| Variable                                                | Category Value               | Nivolumab<br>TBP<br>n (%) | Dacarbazine<br>TBP<br>n (%) | Nivolumab<br>noTBP<br>n (%) | Dacarbazine<br>noTBP<br>n (%) |
|---------------------------------------------------------|------------------------------|---------------------------|-----------------------------|-----------------------------|-------------------------------|
| <b>Prior to Anti-PD-1 Antibody Therapy</b>              |                              |                           |                             |                             |                               |
| <b>Age</b>                                              | Median (IQR), years          | 63 (50, 69)               | 64.5 (57, 72)               | 64 (51, 70)                 | 67 (57,73)                    |
| <b>Sex</b>                                              | Female                       | 31 (52.5)                 | 21 (38.9)                   | 19 (46.3)                   | 35 (36.1)                     |
|                                                         | Male                         | 28 (47.5)                 | 33 (61.1)                   | 22 (53.7)                   | 62 (63.9)                     |
| <b>AJCC Stage at Study Entry</b>                        | Stage III                    | 6 (10.2)                  | 4 (7.4)                     | 7 (17.1)                    | 12 (12.4)                     |
|                                                         | Stage IV                     | 53 (89.8)                 | 50 (92.6)                   | 34 (82.9)                   | 85 (87.6)                     |
| <b>M Stage at Study Entry</b>                           | M0/M1A/M1B                   | 22 (37.3)                 | 20 (37.0)                   | 19 (46.3)                   | 38 (39.2)                     |
|                                                         | M1C                          | 37 (62.7)                 | 34 (63.0)                   | 22 (53.7)                   | 59 (60.8)                     |
| <b>PD-L1 Expression</b>                                 | Negative/Indeterminate       | 39 (66.1)                 | 37 (68.5)                   | 29 (70.7)                   | 64 (66.0)                     |
|                                                         | Positive                     | 20 (33.9)                 | 17 (31.5)                   | 12 (29.3)                   | 33 (34.0)                     |
| <b>BRAF V600 Mutation Status</b>                        | Wild Type                    | 56 (94.9)                 | 54 (100.0)                  | 40 (97.6)                   | 94 (96.9)                     |
|                                                         | Missing                      | 3 (5.1)                   | 0 (0.0)                     | 1 (2.4)                     | 3 (3.1)                       |
| <b>Baseline ECOG Performance Status</b>                 | 0                            | 45 (76.3)                 | 37 (68.5)                   | 26 (63.4)                   | 64 (66.0)                     |
|                                                         | 1                            | 14 (23.7)                 | 17 (31.5)                   | 15 (36.6)                   | 33 (34.0)                     |
| <b>Baseline LDH &gt; ULN Category</b>                   | ≤ULN                         | 39 (66.1)                 | 33 (61.1)                   | 21 (51.2)                   | 65 (67.0)                     |
|                                                         | >ULN                         | 19 (32.2)                 | 20 (37.0)                   | 20 (48.8)                   | 29 (29.9)                     |
|                                                         | Missing                      | 1 (1.7)                   | 1 (1.9)                     | 0 (0.0)                     | 3 (3.1)                       |
| <b>At Time of RECIST-Defined Progression</b>            |                              |                           |                             |                             |                               |
| <b>ECOG Status Within 28 Days Prior to Progression</b>  | 0                            | 41 (69.5)                 | 30 (55.6)                   | 16 (39.0)                   | 47 (48.5)                     |
|                                                         | 1                            | 16 (27.1)                 | 18 (33.3)                   | 13 (31.7)                   | 31 (32.0)                     |
|                                                         | 2                            | 0 (0.0)                   | 1 (1.9)                     | 1 (2.4)                     | 3 (3.1)                       |
|                                                         | Missing                      | 2 (3.4)                   | 5 (9.3)                     | 11 (26.8)                   | 16 (16.5)                     |
|                                                         | Improvement from baseline    | 6 (10.2)                  | 2 (3.7)                     | 2 (4.9)                     | 4 (4.1)                       |
|                                                         | Worsening from baseline      | 8 (13.6)                  | 6 (11.1)                    | 7 (17.1)                    | 13 (13.4)                     |
| <b>LDH Category Within 28 Days Prior to Progression</b> | ≤ULN                         | 35 (59.3)                 | 28 (51.9)                   | 13 (31.7)                   | 45 (46.4)                     |
|                                                         | >ULN                         | 17 (28.8)                 | 10 (18.5)                   | 21 (51.2)                   | 37 (38.1)                     |
|                                                         | Missing                      | 7 (11.9)                  | 16 (29.6)                   | 7 (17.1)                    | 15 (15.5)                     |
|                                                         | Improvement to >ULN          | 5 (8.5)                   | 4 (7.4)                     | 0 (0.0)                     | 5 (5.2)                       |
|                                                         | Worsening of ≤ULN            | 4 (6.8)                   | 1 (1.9)                     | 5 (12.2)                    | 17 (17.5)                     |
| <b>Reason for Progression</b>                           | Target                       | 12 (20.3)                 | 13 (24.1)                   | 6 (14.6)                    | 21 (21.6)                     |
|                                                         | Non-Target                   | 4 (6.8)                   | 8 (14.8)                    | 1 (2.4)                     | 4 (4.1)                       |
|                                                         | New Lesion                   | 23 (39.0)                 | 17 (31.5)                   | 10 (24.4)                   | 24 (24.7)                     |
|                                                         | Non-Target and New Lesion    | 4 (6.8)                   | 3 (5.6)                     | 4 (9.8)                     | 12 (12.4)                     |
|                                                         | Target/Non-Target            | 3 (5.1)                   | 4 (7.4)                     | 0 (0.0)                     | 11 (11.3)                     |
|                                                         | Target/New Lesion            | 6 (10.2)                  | 5 (9.3)                     | 5 (12.2)                    | 14 (14.4)                     |
|                                                         | Target/Non-Target/New Lesion | 7 (11.9)                  | 4 (7.4)                     | 15 (36.6)                   | 11 (11.3)                     |

| Variable                                             | Category Value        | Nivolumab<br>TBP<br>n (%) | Dacarbazine<br>TBP<br>n (%) | Nivolumab<br>noTBP<br>n (%) | Dacarbazine<br>noTBP<br>n (%) |
|------------------------------------------------------|-----------------------|---------------------------|-----------------------------|-----------------------------|-------------------------------|
| <b>Confirmed BOR prior to PD</b>                     | PR                    | 7 (11.9)                  | 5 (9.3)                     | 2 (4.9)                     | 3 (3.1)                       |
|                                                      | SD                    | 14 (23.7)                 | 11 (20.4)                   | 9 (22.0)                    | 31 (32.0)                     |
|                                                      | PD                    | 38 (64.4)                 | 38 (70.4)                   | 30 (73.2)                   | 63 (64.9)                     |
| <b>Duration of Response<br/>Prior to Progression</b> | Median (IQR), months  | 4.2 (2.8, 6.9)            | 3.0 (2.8, 4.4)              | 6.4 (2.8, 9.9)              | 5.6 (4.1, 7.2)                |
| <b>Timing of RECIST PD</b>                           | First Assessment      | 37 (62.7)                 | 38 (70.4)                   | 29 (70.7)                   | 62 (63.9)                     |
|                                                      | Second Assessment     | 8 (13.6)                  | 6 (11.1)                    | 5 (12.2)                    | 13 (13.4)                     |
|                                                      | Third Assessment      | 8 (13.6)                  | 6 (11.1)                    | 4 (9.8)                     | 10 (10.3)                     |
|                                                      | 12 weeks or less      | 36 (61.0)                 | 38 (70.4)                   | 30 (73.2)                   | 62 (63.9)                     |
|                                                      | 13 to 16 weeks        | 7 (11.9)                  | 6 (11.1)                    | 3 (7.3)                     | 12 (12.4)                     |
|                                                      | 17 to 20 weeks        | 3 (5.1)                   | 2 (3.7)                     | 1 (2.4)                     | 4 (4.1)                       |
|                                                      | 21 to 24 weeks        | 8 (13.6)                  | 4 (7.4)                     | 4 (9.8)                     | 5 (5.2)                       |
|                                                      | greater than 24 weeks | 5 (8.5)                   | 4 (7.4)                     | 3 (7.3)                     | 14 (14.4)                     |

Abbreviations: IQR, interquartile range

**Appendix Table S6: Safety Analysis: Adverse Reactions Experienced in >2% of Patients Treated Beyond Progression By Time Period**

| Adverse Event                                   | Pre-Progression<br>n (%)                             |                    | Post-Progression<br>n (%) |            |           |
|-------------------------------------------------|------------------------------------------------------|--------------------|---------------------------|------------|-----------|
|                                                 | All Grades                                           | Grades 3-4         | All Grades                | Grades 3-4 |           |
| Blood And Lymphatic System Disorders            | Anaemia                                              | 57 (8.2)           | 11 (1.6)                  | 59 (8.5)   | 15 (2.2)  |
| Endocrine Disorders                             | Hyperthyroidism                                      | 29 (4.2)           | 0 (0.0)                   | 4 (0.6)    | 0 (0.0)   |
|                                                 | Hypothyroidism                                       | 40 (5.8)           | 0 (0.0)                   | 38 (5.5)   | 1 (0.1)   |
| Gastrointestinal Disorders                      | Abdominal Distension                                 | 21 (3.0)           | 0 (0.0)                   | 12 (1.7)   | 1 (0.1)   |
|                                                 | Abdominal Pain                                       | 47 (6.8)           | 2 (0.3)                   | 48 (6.9)   | 6 (0.9)   |
|                                                 | Abdominal Pain Upper                                 | 26 (3.8)           | 1 (0.1)                   | 18 (2.6)   | 1 (0.1)   |
|                                                 | Constipation                                         | 84 (12.1)          | 0 (0.0)                   | 67 (9.7)   | 4 (0.6)   |
|                                                 | Diarrhoea                                            | 147 (21.2)         | 4 (0.6)                   | 117 (16.9) | 18 (2.6)  |
|                                                 | Dry Mouth                                            | 44 (6.4)           | 0 (0.0)                   | 18 (2.6)   | 0 (0.0)   |
|                                                 | Dyspepsia                                            | 22 (3.2)           | 0 (0.0)                   | 6 (0.9)    | 0 (0.0)   |
|                                                 | Nausea                                               | 138 (19.9)         | 7 (1.0)                   | 98 (14.2)  | 4 (0.6)   |
|                                                 | Vomiting                                             | 75 (10.8)          | 7 (1.0)                   | 60 (8.7)   | 7 (1.0)   |
|                                                 | General Disorders And Administration Site Conditions | Asthenia           | 75 (10.8)                 | 3 (0.4)    | 47 (6.8)  |
| Chest Pain                                      |                                                      | 18 (2.6)           | 1 (0.1)                   | 12 (1.7)   | 1 (0.1)   |
| Chills                                          |                                                      | 39 (5.6)           | 0 (0.0)                   | 22 (3.2)   | 0 (0.0)   |
| Fatigue                                         |                                                      | 238 (34.4)         | 8 (1.2)                   | 121 (17.5) | 7 (1.0)   |
| Influenza Like Illness                          |                                                      | 30 (4.3)           | 0 (0.0)                   | 16 (2.3)   | 0 (0.0)   |
| Oedema Peripheral                               |                                                      | 40 (5.8)           | 2 (0.3)                   | 30 (4.3)   | 3 (0.4)   |
| Pain                                            |                                                      | 27 (3.9)           | 3 (0.4)                   | 20 (2.9)   | 0 (0.0)   |
| Pyrexia                                         |                                                      | 72 (10.4)          | 2 (0.3)                   | 49 (7.1)   | 0 (0.0)   |
| Infections And Infestations                     |                                                      | Nasopharyngitis    | 41 (5.9)                  | 0 (0.0)    | 51 (7.4)  |
|                                                 | Upper Respiratory Tract Infection                    | 26 (3.8)           | 0 (0.0)                   | 19 (2.7)   | 0 (0.0)   |
|                                                 | Urinary Tract Infection                              | 27 (3.9)           | 0 (0.0)                   | 33 (4.8)   | 3 (0.4)   |
| Investigations                                  | Alanine Aminotransferase Increased                   | 35 (5.1)           | 5 (0.7)                   | 26 (3.8)   | 4 (0.6)   |
|                                                 | Aspartate Aminotransferase Increased                 | 32 (4.6)           | 5 (0.7)                   | 26 (3.8)   | 4 (0.6)   |
|                                                 | Blood Alkaline Phosphatase Increased                 | 15 (2.2)           | 0 (0.0)                   | 15 (2.2)   | 1 (0.1)   |
|                                                 | Blood Creatinine Increased                           | 14 (2.0)           | 1 (0.1)                   | 13 (1.9)   | 0 (0.0)   |
|                                                 | Lipase Increased                                     | 17 (2.5)           | 12 (1.7)                  | 11 (1.6)   | 5 (0.7)   |
|                                                 | Weight Decreased                                     | 30 (4.3)           | 0 (0.0)                   | 37 (5.3)   | 2 (0.3)   |
|                                                 | Metabolism And Nutrition Disorders                   | Decreased Appetite | 78 (11.3)                 | 1 (0.1)    | 72 (10.4) |
| Dehydration                                     |                                                      | 8 (1.2)            | 3 (0.4)                   | 18 (2.6)   | 5 (0.7)   |
| Hyperglycaemia                                  |                                                      | 17 (2.5)           | 4 (0.6)                   | 19 (2.7)   | 6 (0.9)   |
| Hypertriglyceridaemia                           |                                                      | 14 (2.0)           | 4 (0.6)                   | 7 (1.0)    | 1 (0.1)   |
| Hypokalaemia                                    |                                                      | 21 (3.0)           | 2 (0.3)                   | 15 (2.2)   | 2 (0.3)   |
| Hyponatraemia                                   |                                                      | 21 (3.0)           | 8 (1.2)                   | 21 (3.0)   | 11 (1.6)  |
| Musculoskeletal And Connective Tissue Disorders | Arthralgia                                           | 92 (13.3)          | 0 (0.0)                   | 56 (8.1)   | 2 (0.3)   |
|                                                 | Back Pain                                            | 56 (8.1)           | 6 (0.9)                   | 53 (7.7)   | 8 (1.2)   |
|                                                 | Groin Pain                                           | 10 (1.4)           | 1 (0.1)                   | 14 (2.0)   | 1 (0.1)   |
|                                                 | Muscle Spasms                                        | 14 (2.0)           | 0 (0.0)                   | 14 (2.0)   | 0 (0.0)   |
|                                                 | Muscular Weakness                                    | 12 (1.7)           | 1 (0.1)                   | 15 (2.2)   | 2 (0.3)   |
|                                                 | Musculoskeletal Pain                                 | 43 (6.2)           | 3 (0.4)                   | 28 (4.0)   | 5 (0.7)   |

| Adverse Event                                                       | Pre-Progression<br>n (%)       |            | Post-Progression<br>n (%) |            |          |
|---------------------------------------------------------------------|--------------------------------|------------|---------------------------|------------|----------|
|                                                                     | All Grades                     | Grades 3-4 | All Grades                | Grades 3-4 |          |
|                                                                     | Myalgia                        | 56 (8.1)   | 0 (0.0)                   | 32 (4.6)   | 3 (0.4)  |
|                                                                     | Neck Pain                      | 12 (1.7)   | 1 (0.1)                   | 14 (2.0)   | 2 (0.3)  |
|                                                                     | Pain In Extremity              | 45 (6.5)   | 1 (0.1)                   | 48 (6.9)   | 3 (0.4)  |
| Neoplasms Benign, Malignant And Unspecified (Incl Cysts And Polyps) | Malignant Neoplasm Progression | 6 (0.9)    | 3 (0.4)                   | 29 (4.2)   | 12 (1.7) |
|                                                                     | Tumour Pain                    | 14 (2.0)   | 2 (0.3)                   | 3 (0.4)    | 1 (0.1)  |
| Nervous System Disorders                                            | Dizziness                      | 52 (7.5)   | 1 (0.1)                   | 34 (4.9)   | 0 (0.0)  |
|                                                                     | Dysgeusia                      | 20 (2.9)   | 0 (0.0)                   | 7 (1.0)    | 0 (0.0)  |
|                                                                     | Headache                       | 84 (12.1)  | 0 (0.0)                   | 62 (9.0)   | 3 (0.4)  |
| Psychiatric Disorders                                               | Anxiety                        | 23 (3.3)   | 0 (0.0)                   | 17 (2.5)   | 1 (0.1)  |
|                                                                     | Depression                     | 18 (2.6)   | 0 (0.0)                   | 12 (1.7)   | 1 (0.1)  |
|                                                                     | Insomnia                       | 44 (6.4)   | 0 (0.0)                   | 35 (5.1)   | 0 (0.0)  |
| Respiratory, Thoracic And Mediastinal Disorders                     | Cough                          | 109 (15.8) | 0 (0.0)                   | 68 (9.8)   | 1 (0.1)  |
|                                                                     | Dyspnoea                       | 55 (7.9)   | 3 (0.4)                   | 45 (6.5)   | 3 (0.4)  |
|                                                                     | Dyspnoea Exertional            | 21 (3.0)   | 0 (0.0)                   | 11 (1.6)   | 0 (0.0)  |
| Skin And Subcutaneous Tissue Disorders                              | Dry Skin                       | 42 (6.1)   | 0 (0.0)                   | 17 (2.5)   | 0 (0.0)  |
|                                                                     | Eczema                         | 14 (2.0)   | 0 (0.0)                   | 10 (1.4)   | 0 (0.0)  |
|                                                                     | Erythema                       | 27 (3.9)   | 0 (0.0)                   | 18 (2.6)   | 0 (0.0)  |
|                                                                     | Pruritus                       | 144 (20.8) | 3 (0.4)                   | 68 (9.8)   | 0 (0.0)  |
|                                                                     | Rash                           | 154 (22.3) | 4 (0.6)                   | 84 (12.1)  | 4 (0.6)  |
|                                                                     | Vitiligo                       | 34 (4.9)   | 0 (0.0)                   | 55 (7.9)   | 1 (0.1)  |
| Vascular Disorders                                                  | Hypertension                   | 24 (3.5)   | 8 (1.2)                   | 17 (2.5)   | 5 (0.7)  |

Abbreviations: Pre-Progression, time period during initial treatment prior to progressive disease; Post-Progression, time period after progression when therapy was continued including events up to 30 days after last dose

**Appendix Table S7: ECOG Performance Status Evolution with Treatment Beyond Progression**

| <b>ECOG PS n (%)</b>             | <b>Baseline</b> | <b>w/in 28 days prior to PD</b> | <b>At Last dose Taken</b> |
|----------------------------------|-----------------|---------------------------------|---------------------------|
| <b>0</b>                         | 533 (77.0)      | 463 (66.9)                      | 398 (57.5)                |
| <b>1</b>                         | 158 (22.8)      | 205 (29.6)                      | 213 (30.8)                |
| <b>2</b>                         | 1 (0.1)         | 7 (1.0)                         | 19 (2.8)                  |
| <b>3</b>                         | 0               | 7 (1.0)                         | 5 (0.7)                   |
| <b>Missing</b>                   | 0               | 10 (1.4)                        | 57 (8.2)                  |
| <b>Improvement from baseline</b> | na              | 39 (5.6)                        | 39 (5.6)                  |
| <b>Worsening from baseline</b>   | na              | 108 (15.6)                      | 143 (20.7)                |

Abbreviations: PD, Progressive Disease; PS, performance status

**Appendix Table S8: Immune-Related Adverse Events within 90 days**

| Adverse Event                                   |                                      | TBP n (%)  |            | noTBP n (%) |            |
|-------------------------------------------------|--------------------------------------|------------|------------|-------------|------------|
|                                                 |                                      | All Grades | Grades 3-4 | All Grades  | Grades 3-4 |
| Endocrine Disorders                             | Adrenal Insufficiency                | 5 (0.7)    | 3 (0.4)    | 4 (0.6)     | 0 (0.0)    |
|                                                 | Hyperthyroidism                      | 1 (0.1)    | 0 (0.0)    | 3 (0.4)     | 1 (0.1)    |
|                                                 | Hypophysitis                         | 6 (0.9)    | 2 (0.3)    | 6 (0.9)     | 2 (0.3)    |
|                                                 | Hypothyroidism                       | 5 (0.7)    | 1 (0.1)    | 2 (0.3)     | 0 (0.0)    |
|                                                 | Thyroiditis                          | 1 (0.1)    | 0 (0.0)    | 2 (0.3)     | 0 (0.0)    |
| Gastrointestinal Disorders                      | Colitis                              | 10 (1.4)   | 3 (0.4)    | 25 (3.7)    | 18 (2.7)   |
|                                                 | Diarrhoea                            | 25 (3.6)   | 12 (1.7)   | 28 (4.2)    | 14 (2.1)   |
|                                                 | Pancreatitis                         | 1 (0.1)    | 0 (0.0)    | 2 (0.3)     | 2 (0.3)    |
| Hepatobiliary Disorders                         | Hepatitis                            | 5 (0.7)    | 3 (0.4)    | 18 (2.7)    | 16 (2.4)   |
| Investigations                                  | Alanine Aminotransferase Increased   | 3 (0.4)    | 3 (0.4)    | 12 (1.8)    | 10 (1.5)   |
|                                                 | Aspartate Aminotransferase Increased | 2 (0.3)    | 1 (0.1)    | 9 (1.3)     | 6 (0.9)    |
| Renal And Urinary Disorders                     | Nephritis                            | 2 (0.3)    | 2 (0.3)    | 2 (0.3)     | 1 (0.1)    |
|                                                 | Renal Failure                        | 0 (0.0)    | 0 (0.0)    | 2 (0.3)     | 1 (0.1)    |
|                                                 | Renal Failure Acute                  | 0 (0.0)    | 0 (0.0)    | 3 (0.4)     | 2 (0.3)    |
| Respiratory, Thoracic And Mediastinal Disorders | Pneumonitis                          | 11 (1.6)   | 0 (0.0)    | 12 (1.8)    | 7 (1.0)    |
| Skin And Subcutaneous Tissue Disorders          | Pruritus                             | 2 (0.3)    | 2 (0.3)    | 1 (0.1)     | 0 (0.0)    |
|                                                 | Rash                                 | 10 (1.4)   | 3 (0.4)    | 11 (1.6)    | 6 (0.9)    |
|                                                 | Vitiligo                             | 1 (0.1)    | 0 (0.0)    | 1 (0.1)     | 0 (0.0)    |

Abbreviations: TBP, treatment beyond progression

**Appendix Table S9: Safety Analysis: Adverse Reactions Experienced prior to initial RECIST v1.1 progression with a  $\geq 2\%$  difference between cohorts**

| Adverse Event                                                       |                                      | TBP n (%)  |            | noTBP n (%) |            |
|---------------------------------------------------------------------|--------------------------------------|------------|------------|-------------|------------|
|                                                                     |                                      | All Grades | Grades 3-4 | All Grades  | Grades 3-4 |
| Blood And Lymphatic System Disorders                                | Anaemia                              | 57 (8.2)   | 11 (1.6)   | 93 (13.9)   | 20 (3.0)   |
| Gastrointestinal Disorders                                          | Abdominal Pain                       | 47 (6.8)   | 2 (0.3)    | 88 (13.2)   | 11 (1.6)   |
|                                                                     | Colitis                              | 6 (0.9)    | 0 (0.0)    | 35 (5.2)    | 24 (3.6)   |
|                                                                     | Constipation                         | 84 (12.1)  | 0 (0.0)    | 121 (18.1)  | 1 (0.1)    |
|                                                                     | Diarrhoea                            | 147 (21.2) | 4 (0.6)    | 186 (27.8)  | 27 (4.0)   |
|                                                                     | Dry Mouth                            | 44 (6.4)   | 0 (0.0)    | 21 (3.1)    | 0 (0.0)    |
|                                                                     | Nausea                               | 138 (19.9) | 7 (1.0)    | 195 (29.1)  | 12 (1.8)   |
|                                                                     | Vomiting                             | 75 (10.8)  | 7 (1.0)    | 120 (17.9)  | 14 (2.1)   |
|                                                                     | General Disorders And Administration | Fatigue    | 238 (34.4) | 8 (1.2)     | 254 (38.0) |
| Site Conditions                                                     | Oedema Peripheral                    | 40 (5.8)   | 2 (0.3)    | 61 (9.1)    | 3 (0.4)    |
|                                                                     | Pyrexia                              | 72 (10.4)  | 2 (0.3)    | 116 (17.3)  | 7 (1.0)    |
| Investigations                                                      | Alanine Aminotransferase Increased   | 35 (5.1)   | 5 (0.7)    | 48 (7.2)    | 18 (2.7)   |
|                                                                     | Aspartate Aminotransferase Increased | 32 (4.6)   | 5 (0.7)    | 47 (7.0)    | 13 (1.9)   |
|                                                                     | Blood Alkaline Phosphatase Increased | 15 (2.2)   | 0 (0.0)    | 35 (5.2)    | 4 (0.6)    |
|                                                                     | Weight Decreased                     | 30 (4.3)   | 0 (0.0)    | 56 (8.4)    | 1 (0.1)    |
| Metabolism And Nutrition Disorders                                  | Decreased Appetite                   | 78 (11.3)  | 1 (0.1)    | 158 (23.6)  | 5 (0.7)    |
|                                                                     | Dehydration                          | 8 (1.2)    | 3 (0.4)    | 29 (4.3)    | 7 (1.0)    |
|                                                                     | Hypoalbuminaemia                     | 7 (1.0)    | 0 (0.0)    | 27 (4.0)    | 6 (0.9)    |
| Musculoskeletal And Connective Tissue Disorders                     | Back Pain                            | 56 (8.1)   | 6 (0.9)    | 77 (11.5)   | 6 (0.9)    |
|                                                                     | Muscular Weakness                    | 12 (1.7)   | 1 (0.1)    | 27 (4.0)    | 3 (0.4)    |
|                                                                     | Musculoskeletal Chest Pain           | 6 (0.9)    | 0 (0.0)    | 22 (3.3)    | 1 (0.1)    |
| Neoplasms Benign, Malignant And Unspecified (Incl Cysts And Polyps) | Malignant Neoplasm Progression       | 6 (0.9)    | 3 (0.4)    | 31 (4.6)    | 16 (2.4)   |
| Nervous System Disorders                                            | Headache                             | 84 (12.1)  | 0 (0.0)    | 104 (15.5)  | 8 (1.2)    |
| Psychiatric Disorders                                               | Insomnia                             | 44 (6.4)   | 0 (0.0)    | 58 (8.7)    | 1 (0.1)    |
| Respiratory, Thoracic And Mediastinal Disorders                     | Cough                                | 109 (15.8) | 0 (0.0)    | 123 (18.4)  | 0 (0.0)    |
|                                                                     | Dyspnoea                             | 55 (7.9)   | 3 (0.4)    | 98 (14.6)   | 14 (2.1)   |
| Skin And Subcutaneous Tissue Disorders                              | Night Sweats                         | 12 (1.7)   | 0 (0.0)    | 30 (4.5)    | 0 (0.0)    |
|                                                                     | Pruritus                             | 144 (20.8) | 3 (0.4)    | 113 (16.9)  | 0 (0.0)    |

Abbreviations: TBP, treatment beyond progression
